# Supplementary material for: Application of Poly-L-Lysine for Tailoring Graphene Oxide Mediated Contact Formation between Lithium Titanium Oxide LTO Surfaces for Batteries
Source: MDPI journal article supplement (doi:10.3390/polym14112150), 2022-05-25
Supplement: s1 [file s1]

# Application of Poly-L-lysine for Tailoring Graphene Oxide Mediated Contact Formation between Lithium Titanium Oxide LTO Surfaces for Batteries

Ignacio Borge-Durán <sup>1,2\*</sup>, Ilya Grinberg <sup>1</sup>, José Roberto Vega-Baudrit <sup>2,3</sup>, Tri Nguyen <sup>4</sup>, Martha Pinheiro <sup>5</sup>, Karsten Thiel <sup>5</sup>, Paul-Ludwig Michael Noeske <sup>5</sup>, Klaus Rischka <sup>5</sup> and Yendry Regina Corrales-Ureña <sup>2,6,\*</sup>

<sup>1</sup> Chemistry Department, Bar-Ilan University, Ramat-Gan 5290002, Israel; iborged@gmail.com (I.B.-D.); ilya.grinberg@biu.ac.il (I.G.)

<sup>2</sup> National Laboratory of Nanotechnology LANOTEC, National Center of High Technology (CeNAT-CONARE), Pavas 1174-1200, San José, Costa Rica; jvegab@gmail.com

<sup>3</sup> Laboratorio de Polímeros (POLIUNA), Universidad Nacional, Heredia 86-3000, Costa Rica

<sup>4</sup> Adolphe Merkle Institute, University of Fribourg, Chemin des Verdiers 4, 1700 Fribourg, Switzerland; minhtri.nguyen@unifr.ch

<sup>5</sup> Adhesive Bonding Technology and Surfaces, Fraunhofer Institute for Manufacturing Technology and Advanced Materials IFAM, Wiener Straße 12, 28359 Bremen, Germany; m.pereira.pinheiro@tue.nl (M.P.); karsten.thiel@ifam.fraunhofer.de (K.T.); michael.noeske@ifam.fraunhofer.de (P.-L.M.N.); klaus.rischka@ifam.fraunhofer.de (K.R.)

<sup>6</sup> Faculty of Production Engineering, University of Bremen, Am Fallturm 1, D-28359 Bremen, Germany

\* Correspondence: \*yendry386@hotmail.com, \*borgedj@biu.ac.il

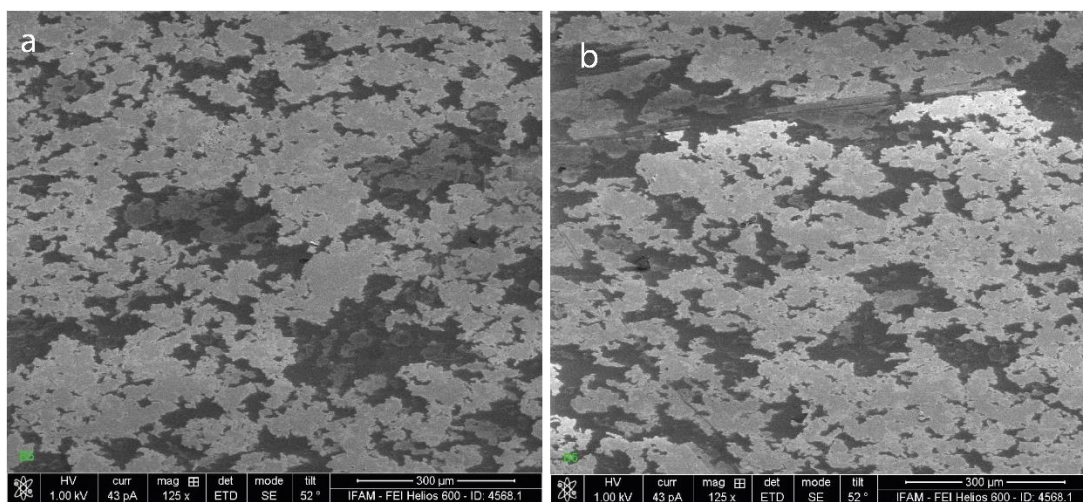

**Supplementary Figure S1.** Scanning Electron Microscopy (SEM) images recorded using detection of secondary electrons (SE-SEM) for TiO<sub>2</sub>/PLL/rGO A) and B) with and without introduced scratches, respectively.
